# Supplementary material for: Genome-wide identification and characterization of CKIN/SnRK gene family in Chlamydomonas reinhardtii
Source: PubMed Central journal article supplement (PMC6344539; doi:10.1038/s41598-018-35625-8), 2019-01-23
Supplement: 41598_2018_35625_MOESM1_ESM.pdf [file 41598_2018_35625_MOESM1_ESM.pdf]

**Genome-wide identification and characterization of CKIN/SnRK gene family in *Chlamydomonas reinhardtii***

Francisco Colina<sup>1</sup>, Joana Amaral<sup>2</sup>, María Carbó<sup>1</sup>, Gloria Pinto<sup>2</sup>, Amadeu Soares<sup>2</sup>, María Jesús Cañal<sup>1</sup>, Luis Valledor<sup>1,2,\*</sup>

<sup>1</sup>*Plant Physiology, Department of Organisms and Systems Biology and University Institute of biotechnology (IUBA), University of Oviedo, Oviedo, Spain;* <sup>2</sup>*Department of Biology and CESAM, University of Aveiro, Aveiro, Portugal.*

\*Corresponding author: [valledorluis@uniovi.es](mailto:valledorluis@uniovi.es)

**Supplementary figures & tables**



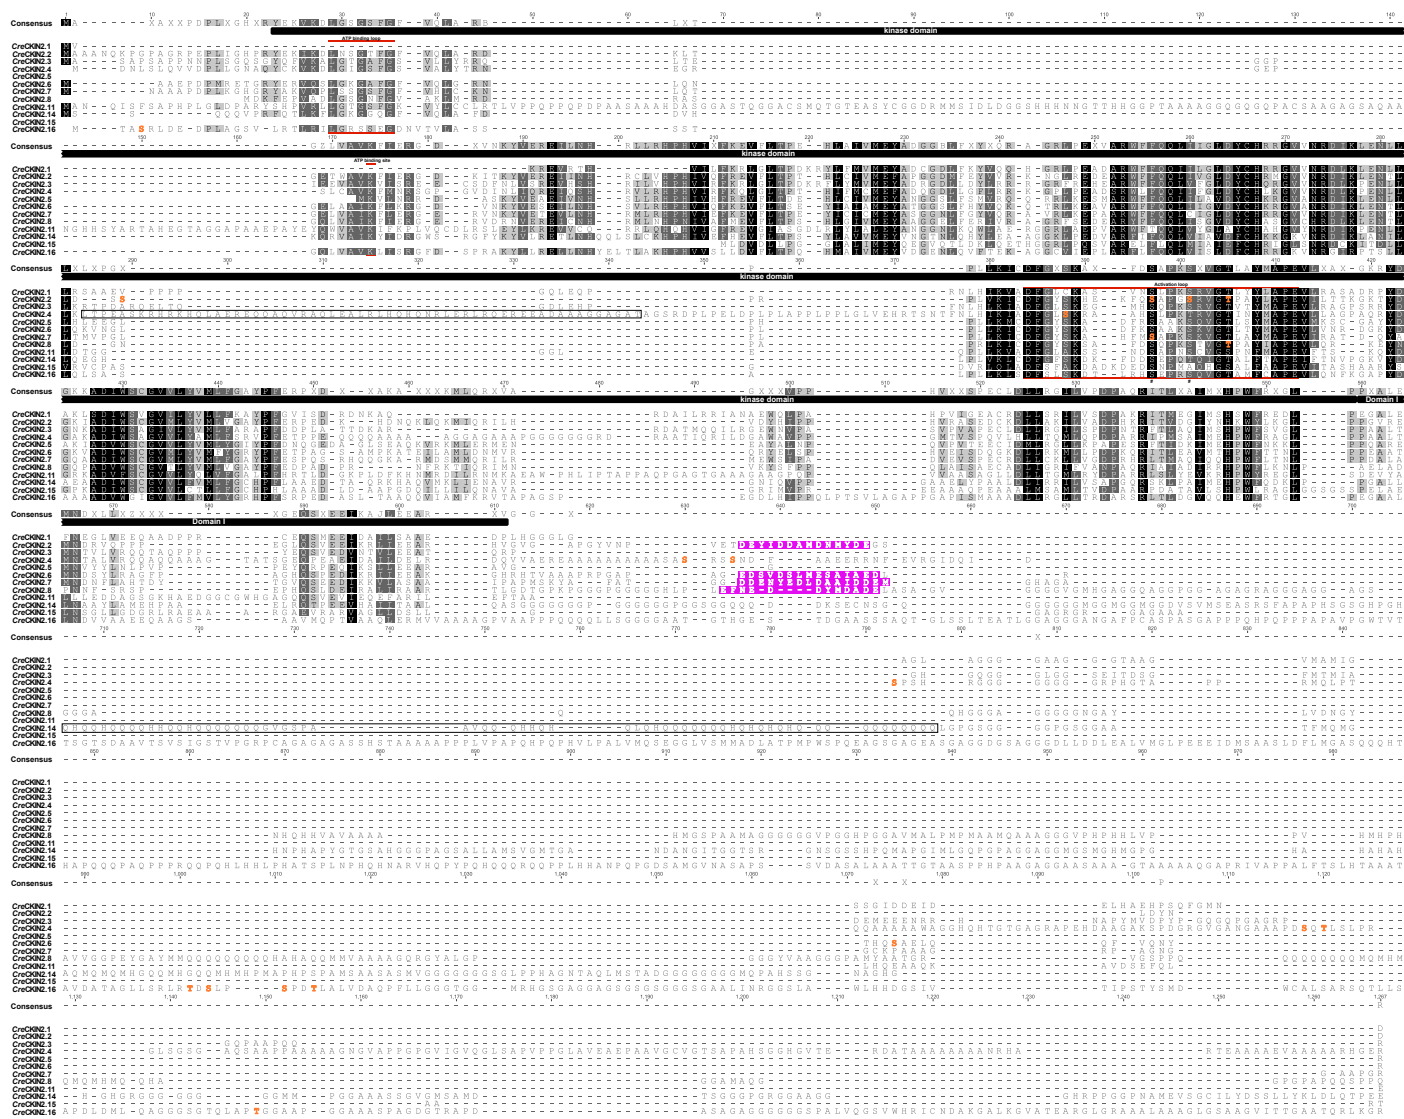

**Supplementary Figure S2:** M-Coffee based sequence structural analysis of *Chlamydomonas* (*Cre*) CKIN2 (A) group. CKIN2.4 and 2.11 show extra sequence loops and along CKIN2.16 long C-terminal ends. CKIN2.15 have a short N-terminal region. CKIN2.4 and 2.14 share predicted coiled-coil regions (rectangled) placed in CKIN2.4 into kinase domain inclusions and in CKIN2.14 in their C-terminal tail. Conserved ATP binding loop/site, and activation loop are marked. Within activation loop, conserved Ser/Threonin activation residues are highlighted (#). Phosphorylated S or T sites are marked in bold orange characters. Domain II like acidic patches into CKIN2.2 and CKIN2.6-8 are highlighted in pink.

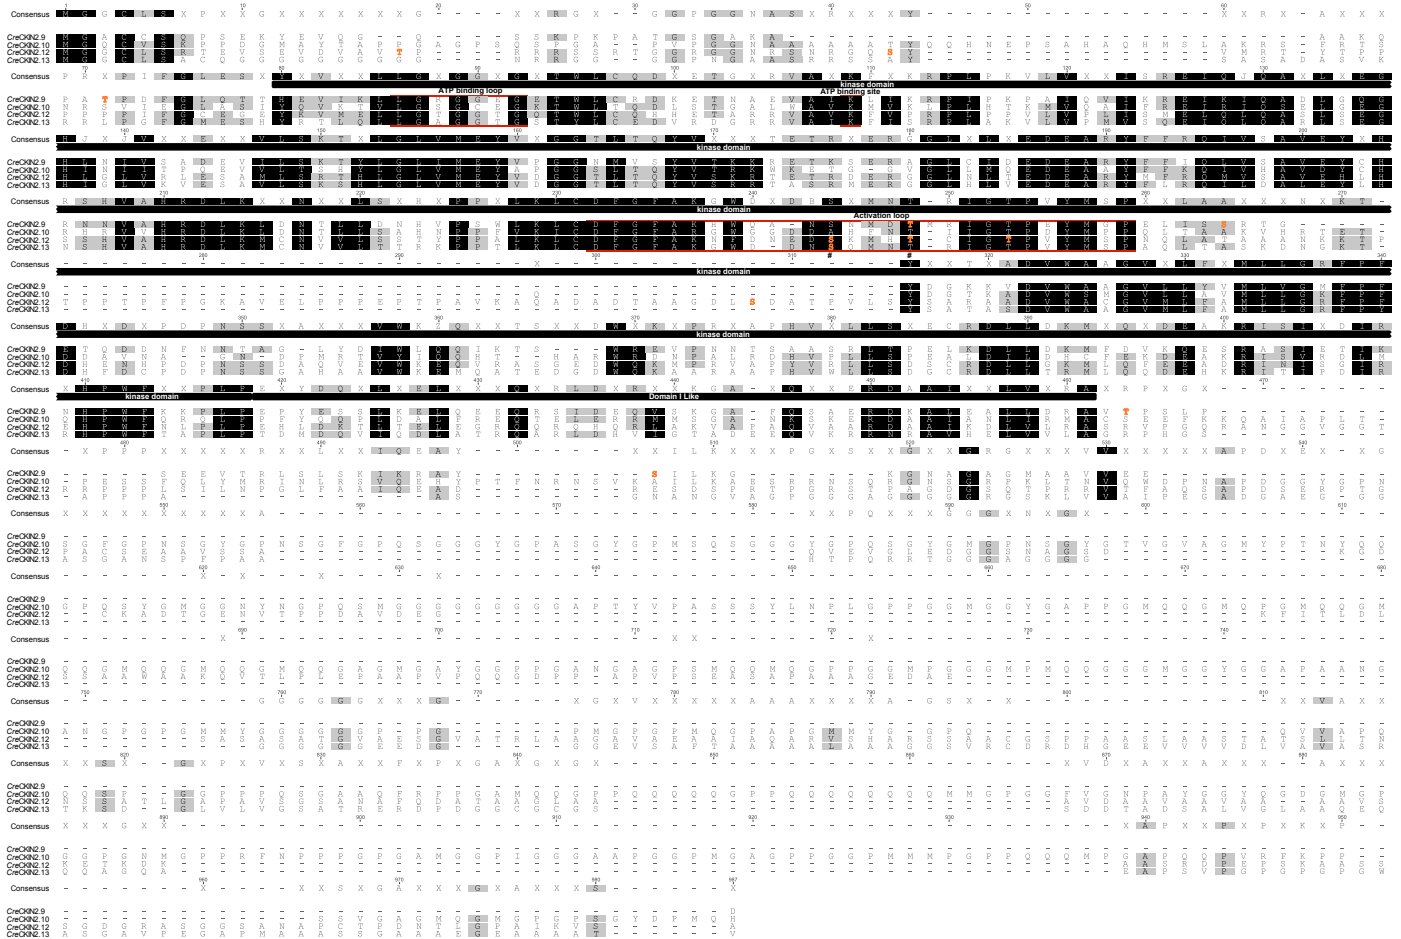

**Supplementary Figure S3:** M-Coffee based sequence structural analysis of *Chlamydomonas* CKIN2 (B) group. All sequences shared kinase domain sequence and a conserved structure (Domain I like) after the catalytic domain. Conserved ATP binding loop/site, and activation loop are marked. Within activation loop, conserved Serine/Threonine activation residues are highlighted (#). Phosphorylated S or T sites are marked in bold orange characters. These terminal regions were also rich in glycine residues in most sequences.

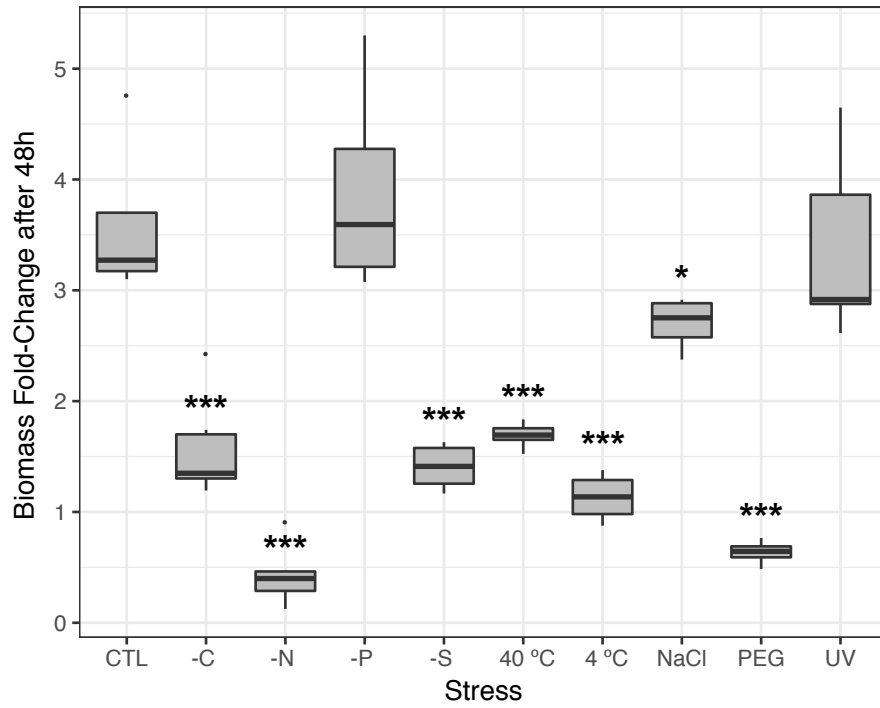

**Supplementary Figure S4:** Boxplot representation of the changes in *Chlamydomonas* biomass after stress assays. Legend: Control (CTL), Nitrogen (-N), Carbon (-C), and Sulphur (-S) deprivation, Phosphorous limitation (5 % P) deprivations, heat and cold stress (40 °C and 4 °C, respectively), UV radiation stress (UV), salt (0.25 M NaCl) and osmotic (20 % PEG). Gravimetical measures of pellet weight at the stress phase (48 h) were normalized by its corresponding controls (0 h). Significant changes induced by stress were marked as \* (t-test,  $p < 0.05$ ) or \*\*\* (t-test,  $p < 0.001$ ).

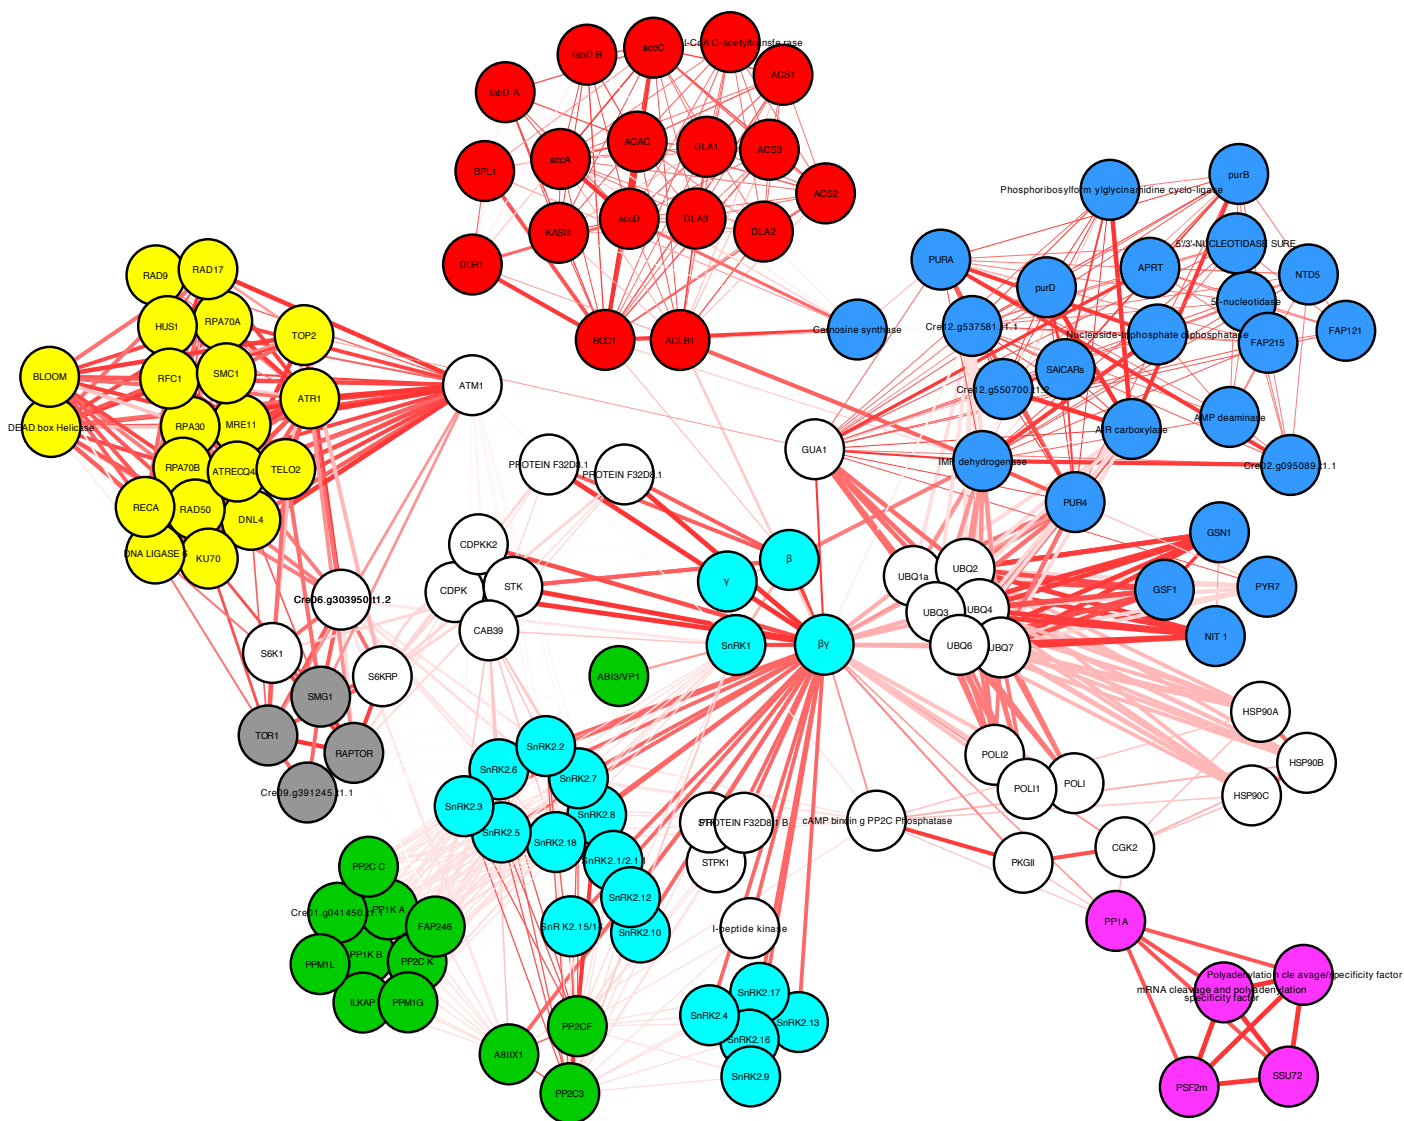

**Supplementary Figure S5:** STRING based Interaction networks of CKIN proteins. CKINs (cyan) interact with major regulatory groups according to KEGG classification: hormone-signalling response (green), autophagy (grey), DNA repair/transcription (yellow), nitrogen acquisition and derived pathways (dark blue), carbon homeostasis (red), mRNA splicing (purple). White nodes represent bridge proteins, mainly Ca-dependent signalling-related, heat shock, transport, or ubiquitin proteins. Edge thickness represent the combined interaction score provided by STRING-db (confidence range 0.7-0.999) while edge color intensity shows the experimental evidence of the interactions (confidence range 0.131-0.989).

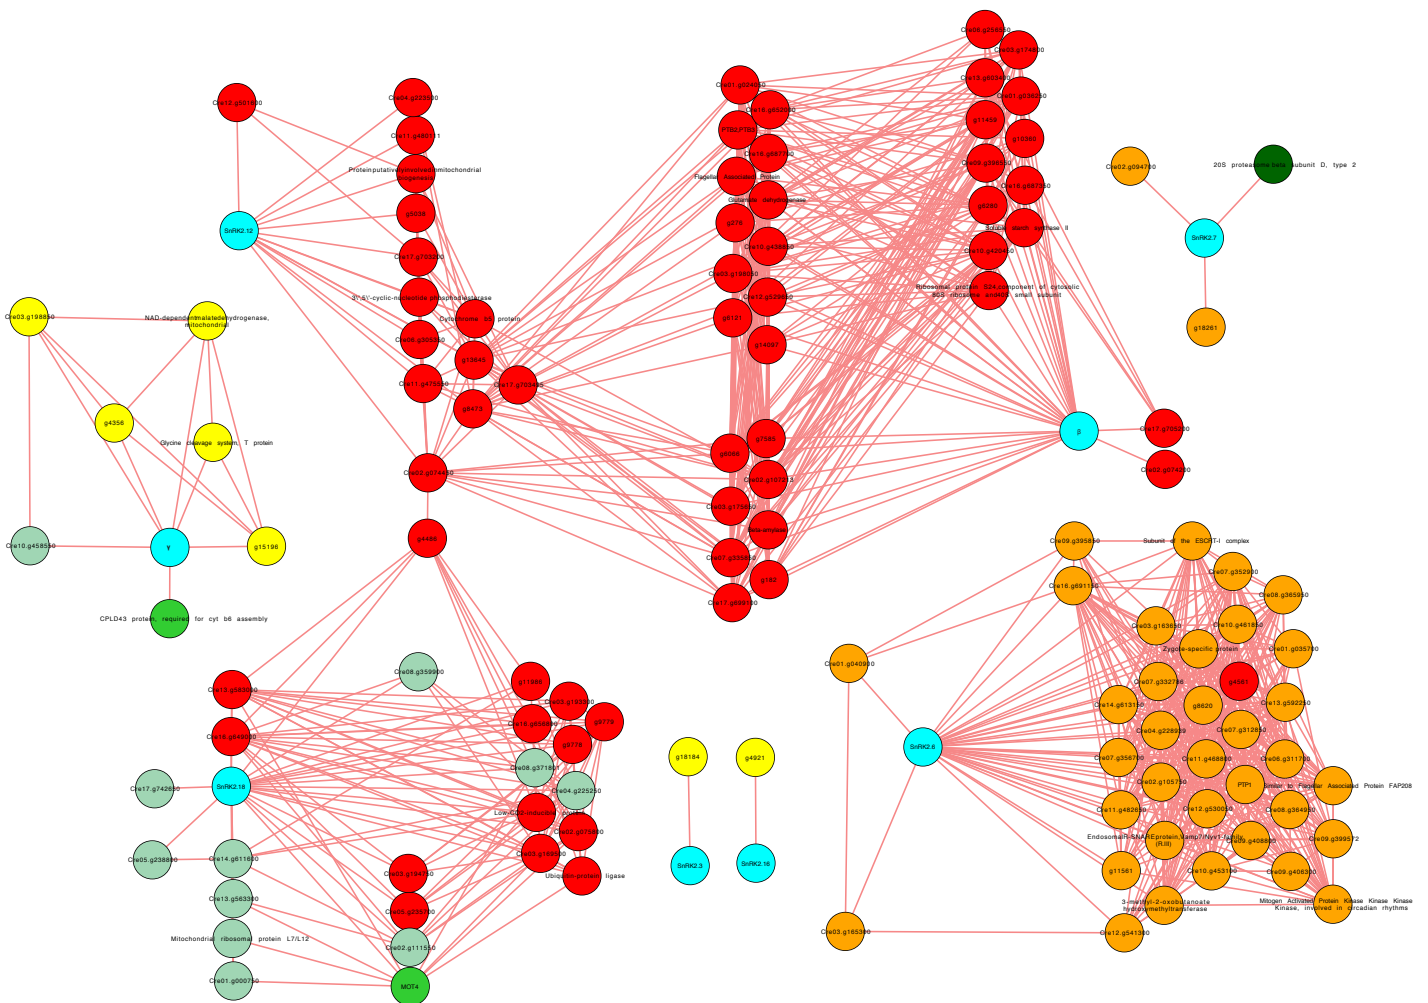

**Supplementary Figure S6:** ChlamyNet based interaction network of CKIN proteins. CKINs (cyan) interact with major regulatory groups according to GO classification: Protein complex assembly and response to misfolded protein (green), response to heat and misfolded protein (dark green), protein phosphorylation, ribosome biogenesis and macromolecule biosynthesis (red), autophagy, GTPase activity and vesicle mediated transport (orange), chromatin organization and postranscriptional organization (yellow), photosynthesis and hexose metabolic process (turquoise).

**Supplementary Table S1.** *Arabidopsis thaliana* (*Ath*) and *Chlamydomonas reinhardtii* (*Cre*) query sequences used for BLAST homology search to identify putative CKIN sequences into the *C. reinhardtii* genome. Names and accessions (ID) were indicated below. \**Chlamydomonas* sequences previously referred to as CKIN family by <sup>1</sup> Valledor et al. (2013) and SnRK2 subfamily by <sup>2</sup> Gonzalez-Ballester et al. (2008).

| Name     | <i>Ath/Cre</i> ID | Name     | <i>Ath/Cre</i> ID | Name                  | <i>Ath/Cre</i> ID  |
|----------|-------------------|----------|-------------------|-----------------------|--------------------|
| AKIN10   | AT3g01090         | SnRK3.3  | AT4g14580         | SnRK3.23              | AT1g30270          |
| AKIN11   | AT3g29160         | SnRK3.4  | AT5g57630         | SnRK3.24              | AT5g10930          |
| β1       | AT5g21170         | SnRK3.5  | AT5g45810         | SnRK3.25              | AT5g25110          |
| β2       | AT4g16360         | SnRK3.6  | AT5g45820         | CKIN1* <sup>1</sup>   | Cre04.g211600.t1.1 |
| β3       | AT2g28060         | SnRK3.7  | AT2g34180         | CKIN γ* <sup>1</sup>  | Cre12.g528000.t1.2 |
| βγ       | AT1g09020         | SnRK3.8  | AT5g58380         | CKIN2.1* <sup>2</sup> | Cre02.g075850.t1.1 |
| γ1       | AT3g48530         | SnRK3.9  | AT4g18700         | CKIN2.2* <sup>2</sup> | Cre12.g499500.t1.1 |
| γ2       | AT1g69800         | SnRK3.10 | AT3g23000         | CKIN2.3* <sup>2</sup> | Cre02.g075900.t1.1 |
| SnRK2.1  | AT5g08590         | SnRK3.11 | AT5g35410         | CKIN2.4* <sup>2</sup> | Cre11.g477000.t1.2 |
| SnRK2.2  | AT3g50500         | SnRK3.12 | AT1g01140         | CKIN2.5* <sup>2</sup> | Cre03.g209505.t1.1 |
| SnRK2.3  | AT5g66880         | SnRK3.13 | AT4g24400         | CKIN2.6* <sup>2</sup> | Cre11.g481000.t1.2 |
| SnRK2.4  | AT1g10940         | SnRK3.14 | AT4g30960         | CKIN2.7* <sup>2</sup> | Cre06.g292700.t1.2 |
| SnRK2.5  | AT5g63650         | SnRK3.15 | AT5g01820         | CKIN2.8* <sup>2</sup> | Cre10.g466350.t1.1 |
| SnRK2.6  | AT4g33950         | SnRK3.16 | AT3g17510         |                       |                    |
| SnRK2.7  | AT4g40010         | SnRK3.17 | AT2g26980         |                       |                    |
| SnRK2.8  | AT1g78290         | SnRK3.18 | AT2g25090         |                       |                    |
| SnRK2.9  | AT2g23030         | SnRK3.19 | AT2g38490         |                       |                    |
| SnRK2.10 | AT1g60940         | SnRK3.20 | AT1g29230         |                       |                    |
| SnRK3.1  | AT5g01810         | SnRK3.21 | AT1g48260         |                       |                    |
| SnRK3.2  | AT5g07070         | SnRK3.22 | AT2g30360         |                       |                    |



**Supplementary Table S2.** Uncurated BLAST results for *Chlamydomonas* protein. Sequences were considered homologous for e-values lower than  $10^{-25}$ .

| <i>Cre</i> Accession | e-value               | <i>Ath</i> Accession | <i>Cre</i> Accession | e-value               | <i>Ath</i> Accession |
|----------------------|-----------------------|----------------------|----------------------|-----------------------|----------------------|
| Cre10.g457500.t1.1   | 1.86e <sup>-69</sup>  | AT4G16360.1          | Cre09.g400330.t1.1   | 1.91e <sup>-37</sup>  | AT1G30270.1          |
| Cre01.g001800.t1.1   | 3.71e <sup>-32</sup>  | AT2G34180.1          | Cre09.g400330.t2.1   | 1.96e <sup>-37</sup>  | AT1G30270.1          |
| Cre01.g003524.t1.1   | 7.85e <sup>-37</sup>  | AT4G24400.2          | Cre09.g412750.t1.2   | 1.91e <sup>-43</sup>  | AT2G30360.1          |
| Cre01.g009500.t1.2   | 1.90e <sup>-46</sup>  | AT5G35410.1          | Cre10.g428650.t1.2   | 1.16e <sup>-45</sup>  | AT5G25110.1          |
| Cre01.g010000.t1.2   | 1.31e <sup>-29</sup>  | AT5G39440.1          | Cre10.g443300.t1.2   | 5.71e <sup>-29</sup>  | AT3G01090.1          |
| Cre01.g016570.t1.1   | 1.49e <sup>-29</sup>  | AT2G25090.1          | Cre10.g457700.t1.2   | 6.47e <sup>-66</sup>  | AT3G01090.1          |
| Cre01.g029500.t1.2   | 1.47e <sup>-27</sup>  | AT2G26980.3          | Cre10.g463500.t1.1   | 3.60e <sup>-27</sup>  | AT5G07070.1          |
| Cre01.g029850.t1.2   | 3.03e <sup>-37</sup>  | AT4G24400.2          | Cre10.g464100.t1.2   | 6.14e <sup>-33</sup>  | AT5G25110.1          |
| Cre01.g034900.t1.2   | 2.16e <sup>-30</sup>  | AT3G29160.1          | Cre10.g465900.t1.2   | 6.17e <sup>-31</sup>  | AT4G18700.1          |
| Cre01.g036650.t1.1   | 3.25e <sup>-32</sup>  | AT3G01090.1          | Cre10.g466350.t1.1   | 2.96e <sup>-152</sup> | AT4G33950.1          |
| Cre01.g036700.t1.2   | 3.30e <sup>-30</sup>  | AT3G01090.1          | Cre11.g467568.t1.1   | 8.50e <sup>-36</sup>  | AT1G29230.1          |
| Cre01.g037100.t1.1   | 6.68e <sup>-34</sup>  | AT1G30270.1          | Cre11.g477000.t1.2   | 2.35e <sup>-29</sup>  | AT5G63650.1          |
| Cre01.g048650.t1.1   | 9.37e <sup>-35</sup>  | AT3G01090.1          | Cre11.g481000.t1.2   | 1.91e <sup>-88</sup>  | AT4G33950.1          |
| Cre02.g074370.t1.2   | 2.51e <sup>-41</sup>  | AT4G18700.1          | Cre12.g484350.t1.1   | 2.88e <sup>-52</sup>  | AT1G09020.1          |
| Cre02.g075350.t1.2   | 3.38e <sup>-33</sup>  | AT3G29160.1          | Cre12.g485600.t1.2   | 5.64e <sup>-47</sup>  | AT1G78290.2          |
| Cre02.g075350.t2.1   | 2.12e <sup>-33</sup>  | AT3G29160.1          | Cre12.g486350.t1.1   | 9.55e <sup>-38</sup>  | AT3G01090.1          |
| Cre02.g075350.t3.1   | 3.38e <sup>-33</sup>  | AT3G29160.1          | Cre12.g493250.t1.2   | 8.45e <sup>-34</sup>  | AT2G30360.1          |
| Cre02.g075850.t1.1   | 1.33e <sup>-57</sup>  | AT4G33950.1          | Cre12.g498650.t1.2   | 4.16e <sup>-28</sup>  | AT3G01090.1          |
| Cre02.g075900.t2.1   | 1.06e <sup>-53</sup>  | AT4G33950.1          | Cre12.g499500.t1.1   | 4.02e <sup>-117</sup> | AT1G78290.2          |
| Cre02.g075950.t1.1   | 6.60e <sup>-73</sup>  | AT5G66880.1          | Cre12.g499850.t1.1   | 1.48e <sup>-37</sup>  | AT5G25110.1          |
| Cre02.g076000.t1.2   | 1.07e <sup>-40</sup>  | AT5G08590.1          | Cre12.g508900.t1.2   | 4.55e <sup>-31</sup>  | AT3G01090.1          |
| Cre02.g076900.t1.1   | 5.58e <sup>-45</sup>  | AT3G23000.1          | Cre12.g509000.t1.1   | 4.89e <sup>-32</sup>  | AT3G01090.1          |
| Cre02.g106650.t1.1   | 3.39e <sup>-44</sup>  | AT2G26980.3          | Cre12.g514650.t1.2   | 6.81e <sup>-35</sup>  | AT1G30270.1          |
| Cre02.g107800.t1.1   | 2.45e <sup>-32</sup>  | AT3G01090.1          | Cre12.g527000.t1.2   | 4.34e <sup>-39</sup>  | AT5G25110.1          |
| Cre02.g112333.t1.1   | 1.51e <sup>-30</sup>  | AT2G30360.1          | Cre12.g529550.t1.2   | 1.63e <sup>-36</sup>  | AT1G30270.1          |
| Cre02.g113600.t1.2   | 1.12e <sup>-30</sup>  | AT2G25090.1          | Cre12.g537400.t1.1   | 1.90e <sup>-40</sup>  | AT2G30360.1          |
| Cre02.g114750.t1.2   | 2.61e <sup>-48</sup>  | AT1G01140.2          | Cre12.g538300.t1.1   | 4.36e <sup>-28</sup>  | AT5G35410.1          |
| Cre03.g144484.t1.1   | 5.09e <sup>-43</sup>  | AT3G01090.1          | Cre12.g560350.t1.1   | 9.83e <sup>-34</sup>  | AT5G45820.1          |
| Cre03.g153150.t1.2   | 4.07e <sup>-37</sup>  | AT2G38490.1          | Cre12.g560350.t2.1   | 9.60e <sup>-34</sup>  | AT5G45820.1          |
| Cre03.g164900.t1.1   | 3.35e <sup>-27</sup>  | AT2G34180.1          | Cre13.g564500.t1.1   | 2.17e <sup>-41</sup>  | AT1G01140.2          |
| Cre03.g169500.t1.2   | 4.41e <sup>-27</sup>  | AT5G45810.1          | Cre13.g567550.t1.1   | 2.85e <sup>-32</sup>  | AT1G29230.1          |
| Cre03.g190050.t1.1   | 6.79e <sup>-35</sup>  | AT3G01090.1          | Cre13.g567550.t2.1   | 3.31e <sup>-32</sup>  | AT1G29230.1          |
| Cre03.g199050.t1.2   | 2.14e <sup>-49</sup>  | AT1G30270.1          | Cre13.g568050.t1.1   | 2.59e <sup>-58</sup>  | AT5G66880.1          |
| Cre03.g209505.t1.1   | 3.81e <sup>-63</sup>  | AT1G78290.2          | Cre13.g570250.t1.1   | 1.56e <sup>-76</sup>  | AT3G01090.1          |
| Cre04.g211600.t1.1   | 0                     | AT3G01090.1          | Cre13.g571700.t1.1   | 8.10e <sup>-52</sup>  | AT3G01090.1          |
| Cre04.g220700.t1.2   | 4.92e <sup>-52</sup>  | AT5G10930.1          | Cre13.g579200.t1.2   | 2.46e <sup>-36</sup>  | AT2G25090.1          |
| Cre04.g228800.t1.1   | 4.76e <sup>-29</sup>  | AT1G30270.1          | Cre13.g592000.t1.2   | 4.10e <sup>-37</sup>  | AT3G01090.1          |
| Cre05.g232750.t1.2   | 9.50e <sup>-33</sup>  | AT3G01090.1          | Cre14.g612000.t1.2   | 1.76e <sup>-35</sup>  | AT1G30270.1          |
| Cre06.g251050.t1.1   | 1.44e <sup>-62</sup>  | AT3G29160.1          | Cre16.g657350.t1.2   | 5.77e <sup>-59</sup>  | AT1G78290.2          |
| Cre06.g265550.t1.2   | 2.99e <sup>-43</sup>  | AT5G10930.1          | Cre16.g659400.t1.1   | 2.12e <sup>-28</sup>  | AT2G34180.1          |
| Cre06.g268150.t1.1   | 2.08e <sup>-27</sup>  | AT5G39440.1          | Cre16.g659400.t2.1   | 3.09e <sup>-29</sup>  | AT1G30270.1          |
| Cre06.g292700.t1.2   | 8.68e <sup>-103</sup> | AT4G33950.1          | Cre16.g663200.t1.1   | 1.43e <sup>-38</sup>  | AT3G29160.1          |
| Cre06.g296200.t1.2   | 9.41e <sup>-46</sup>  | AT3G29160.1          | Cre16.g665364.t1.1   | 1.16e <sup>-53</sup>  | AT3G01090.1          |
| Cre06.g306950.t1.1   | 1.10e <sup>-31</sup>  | AT5G01810.1          | Cre16.g669800.t1.2   | 1.14e <sup>-50</sup>  | AT5G25110.1          |
| Cre07.g317300.t1.1   | 2.83e <sup>-28</sup>  | AT5G01820.1          | Cre16.g672602.t1.1   | 2.58e <sup>-26</sup>  | AT5G35410.1          |
| Cre07.g328850.t1.2   | 1.45e <sup>-28</sup>  | AT1G29230.1          | Cre16.g676309.t1.1   | 1.32e <sup>-27</sup>  | AT5G01810.1          |
| Cre07.g328900.t1.2   | 3.33e <sup>-50</sup>  | AT2G26980.3          | Cre16.g685389.t1.1   | 4.18e <sup>-37</sup>  | AT4G18700.1          |
| Cre07.g329850.t1.1   | 3.09e <sup>-37</sup>  | AT5G08590.1          | Cre17.g705000.t1.2   | 7.65e <sup>-55</sup>  | AT5G25110.1          |
| Cre07.g348450.t1.1   | 2.51e <sup>-30</sup>  | AT5G01810.1          | Cre17.g705350.t1.1   | 4.72e <sup>-39</sup>  | AT5G01810.1          |
| Cre07.g351150.t1.2   | 1.10e <sup>-27</sup>  | AT5G45820.1          | Cre17.g707800.t1.2   | 9.81e <sup>-46</sup>  | AT1G78290.2          |
| Cre08.g359900.t1.1   | 1.71e <sup>-35</sup>  | AT2G30360.1          | Cre17.g719450.t1.1   | 4.92e <sup>-34</sup>  | AT5G10930.1          |
| Cre08.g382800.t1.2   | 2.80e <sup>-35</sup>  | AT5G10930.1          | Cre17.g728700.t1.1   | 2.71e <sup>-35</sup>  | AT2G30360.1          |
| Cre08.g385050.t1.1   | 2.98e <sup>-28</sup>  | AT3G01090.1          | Cre17.g733300.t1.1   | 6.38e <sup>-33</sup>  | AT4G24400.2          |
| Cre09.g388000.t1.2   | 4.15e <sup>-36</sup>  | AT2G25090.1          | Cre17.g747397.t1.1   | 5.09e <sup>-28</sup>  | AT4G30960.1          |
| Cre09.g391245.t1.1   | 3.93e <sup>-47</sup>  | AT1G01140.2          | Cre19.g750597.t1.1   | 6.08e <sup>-52</sup>  | AT3G01090.1          |

**Supplementary Table S3.** SnRK/CKIN clusters, protein domain names, and domain identifiers (ID) both in *Arabidopsis thaliana* (*Ath*) and *Chlamydomonas reinhardtii* (*Cre*), and corresponding *Cre* sequence names. SnRK clusters according to sequence similarity and protein domain layout (CKIN1/SnRK1/AKIN: containing the Serin/Threonin Kinase PTHR24343:SF183, IPR015940 and IPR001772 domains; S1R: regulatory subunits of SnRK1 with PTHR10343, PTHR13780:SF35, IPR032640, IPR000644, IPR006828 and IPR013785 domains; CKIN2/SnRK2: containing the Serin/Threonin Kinase PTHR24343, PTHR24343:SF169, PTHR24343:SF207, PTHR24343:SF167 or PTHR24343:SF200 domains, with CKIN1L exception, containing the MAP/microtubule affinity-regulating kinase PTHR24346:SF5 or the Serin/Threonin protein kinase PTHR24343:SF302 and IPR015940 domains).

| SnRK Cluster           | Domain name                                                   | <i>Ath</i> Domain ID | <i>Cre</i> Domain ID | <i>Cre</i> Name    |
|------------------------|---------------------------------------------------------------|----------------------|----------------------|--------------------|
| CKIN1/SnRK1/AKIN       | KA1 domain                                                    | IPR001772            | IPR001772            | CKIN1              |
|                        | Serin/Threonin Kinase                                         | PTHR24343            | PTHR24343            | CKIN1              |
|                        | Serin/Threonin Kinase                                         | PTHR24343:SF183      | PTHR24343:SF183      | CKIN1              |
|                        | Serin/Threonin Kinase                                         | PTHR24343:SF156      |                      |                    |
|                        | UBA domain                                                    | IPR015940            | IPR015940            | CKIN1              |
|                        | MAP/microtubule affinity-regulating kinase                    |                      | PTHR24346            |                    |
|                        | Serin/Threonin protein kinase UBA domain                      |                      | PTHR24346:SF5        | CKIN1L             |
|                        |                                                               |                      | PTHR24343:SF302      | CKIN1L             |
|                        |                                                               |                      | IPR015940            | CKIN1L             |
| S1 R ( $\beta$ )       | AMPK, $\beta$ subunit                                         | PTHR10343            | PTHR10343            | CKIN $\beta$       |
|                        | SnRK 1, $\beta$ -1 regulatory subunit                         | PTHR10343:SF51       |                      | CKIN $\beta$       |
|                        | Immunoglobulin E-set                                          | IPR014756            | IPR014756            | CKIN $\beta$       |
|                        | AMPK, glycogen-binding domain                                 | IPR032640            | IPR032640            | CKIN $\beta$       |
|                        | Association with the SNF1 complex domain (ASC)                | IPR006828            | IPR006828            | CKIN $\beta$       |
| S1 R ( $\beta\gamma$ ) | AMPK, $\gamma$ regulatory subunit                             | PTHR13780            | PTHR13780            | CKIN $\beta\gamma$ |
|                        | AMPK, $\gamma$ regulatory subunit                             |                      | PTHR13780:SF35       | CKIN $\beta\gamma$ |
|                        | AMP-activated protein kinase, glycogen-binding domain         | IPR032640            | IPR032640            | CKIN $\beta\gamma$ |
|                        | CBS domain                                                    | IPR000644            | IPR000644            | CKIN $\beta\gamma$ |
| S1 R ( $\gamma$ )      | Immunoglobulin E-set                                          | IPR014756            | IPR014756            | CKIN $\beta\gamma$ |
|                        | AMPK, $\gamma$ regulatory subunit                             | PTHR13780            | PTHR13780            | CKIN $\gamma$      |
|                        | AMPK, $\gamma$ regulatory subunit                             | PTHR13780:SF47       |                      |                    |
| CKIN2/SnRK2            | SnRK 1, $\gamma$ regulatory subunit                           | PTHR13780:SF36       |                      |                    |
|                        | AMPK, $\gamma$ regulatory subunit                             |                      | PTHR13780:SF49       | CKIN $\gamma$      |
|                        | CBS domain                                                    | IPR000644            | IPR000644            | CKIN $\gamma$      |
|                        | Serin/Threonin kinase                                         | PTHR24343            | PTHR24343            | CKIN2              |
|                        | Serin/Threonin Protein Kinase SRK2D-Related                   |                      | PTHR24343:SF169      | CKIN2.8            |
|                        | Serin/Threonin Protein Kinase SRK2C                           |                      | PTHR24343:SF207      | CKIN2.2            |
|                        | Serin/Threonin Protein Kinase SRK2E                           |                      | PTHR24343:SF167      | CKIN2.12           |
|                        |                                                               |                      |                      | CKIN2.19           |
|                        |                                                               |                      |                      | CKIN2.10           |
|                        |                                                               |                      |                      | CKIN2.13           |
| CKINL                  | Serin/Threonin Protein Kinase SRK2F                           |                      | PTHR24343:SF200      | CKINL              |
| SnRK3                  | Serin/Threonin Kinase                                         | PTHR24343            | PTHR24343            |                    |
|                        | Calcium/calmodulin-dependent/calcium-dependent protein kinase | PTHR24347            | PTHR24347            |                    |
|                        | NAF                                                           | IPR004041            |                      |                    |
|                        | NAF/FISL                                                      | IPR018451            |                      |                    |

**Supplementary Table S4.** *Arabidopsis thaliana* (*Ath*), *Chlamydomonas reinhardtii* (*Cre*), *Chlorella variabilis* (*Cva*), *Coccomyxa subellipsoidea* (*Csu*), *Dunaliella salina* (*Dsa*) and *Volvox carteri* (*Vca*) sequences used for the design of the figure 3 sequence tree: sequence identifier (Seq ID) followed by sequence name (Name).

| Seq ID                                            | Name                | Seq ID                               | Name                 |
|---------------------------------------------------|---------------------|--------------------------------------|----------------------|
| AT3g01090                                         | <i>Ath</i> AKIN10   | jgi ChINC64A_1 140361 IGS.gm_3_00100 | <i>Cva</i> CvKIN2.10 |
| AT3g29160                                         | <i>Ath</i> AKIN11   | jgi ChINC64A_1 142950 IGS.gm_5_00279 | <i>Cva</i> CvKIN2.11 |
| AT5g39440                                         | <i>Ath</i> SnRK1.3  | jgi ChINC64A_1 143933 IGS.gm_6_00507 | <i>Cva</i> CvKIN2.12 |
| AT5g08590                                         | <i>Ath</i> SnRK2.1  | jgi ChINC64A_1 145069 IGS.gm_8_00397 | <i>Cva</i> CvKIN2.13 |
| AT3g50500                                         | <i>Ath</i> SnRK2.2  | jgi ChINC64A_1 140646 IGS.gm_3_00385 | <i>Cva</i> CvKIN2.14 |
| AT5g66880                                         | <i>Ath</i> SnRK2.3  | e_gw1.10.111.1 16775                 | <i>Csu</i> CsKIN1    |
| AT4g33950                                         | <i>Ath</i> SnRK2.6  | e_gw1.3.241.1 12786                  | <i>Csu</i> CsKIN2.2  |
| AT4g40010                                         | <i>Ath</i> SnRK2.7  | estExt_fgenes1_pg.C_100215 47867     | <i>Csu</i> CsKIN2.3  |
| AT2g23030                                         | <i>Ath</i> SnRK2.9  | estExt_fgenes1_pg.C_240007 49286     | <i>Csu</i> CsKIN2.4  |
| AT1g60940                                         | <i>Ath</i> SnRK2.10 | estExt_fgenes1_pm.C_150088 54361     | <i>Csu</i> CsKIN2.5  |
| AT5g01810                                         | <i>Ath</i> SnRK3.1  | estExt_Genemark1.C_30088 64800       | <i>Csu</i> CsKIN2.6  |
| AT5g07070                                         | <i>Ath</i> SnRK3.2  | estExt_Genemark1.C_30287 64904       | <i>Csu</i> CsKIN2.7  |
| AT4g14580                                         | <i>Ath</i> SnRK3.3  | estExt_Genemark1.C_90162 66347       | <i>Csu</i> CsKIN2.8  |
| AT5g57630                                         | <i>Ath</i> SnRK3.4  | estExt_Genemark1.C_240049 68309      | <i>Csu</i> CsKIN2.9  |
| AT5g45810                                         | <i>Ath</i> SnRK3.5  | estExt_Genewise1.C_100280 24306      | <i>Csu</i> CsKIN2.10 |
| Cre04.g211600.t1.1                                | <i>Cre</i> CKIN1    | estExt_Genewise1.C_190274 25912      | <i>Csu</i> CsKIN2.11 |
| Cre13.g570250.t1.1                                | <i>Cre</i> CKIN1L   | estExt_Genewise1Plus.C_30441 27599   | <i>Csu</i> CsKIN2.12 |
| Cre02.g075850.t1.1                                | <i>Cre</i> CKIN2.1  | estExt_Genewise1Plus.C_30509 27636   | <i>Csu</i> CsKIN2.13 |
| Cre12.g499500.t1.1                                | <i>Cre</i> CKIN2.2  | estExt_Genewise1Plus.C_30548 27662   | <i>Csu</i> CsKIN2.14 |
| Cre02.g075900.t1.1                                | <i>Cre</i> CKIN2.3  | estExt_Genewise1Plus.C_100351 29722  | <i>Csu</i> CsKIN2.15 |
| Cre11.g477000.t1.2                                | <i>Cre</i> CKIN2.4  | estExt_Genewise1Plus.C_100354 29725  | <i>Csu</i> CsKIN2.16 |
| Cre03.g209505.t1.1                                | <i>Cre</i> CKIN2.5  | fgenes1_pg.20_#_52 44853             | <i>Csu</i> CsKIN2.17 |
| Cre11.g481000.t1.2                                | <i>Cre</i> CKIN2.6  | e_gw1.5.212.1 14400                  | <i>Csu</i> CsKIN2.18 |
| Cre06.g292700.t1.2                                | <i>Cre</i> CKIN2.7  | Dusal.0281s00020 Dusal.0281s00020.1  | <i>Dsa</i> DKIN1     |
| Cre10.g466350.t1.1                                | <i>Cre</i> CKIN2.8  | Dusal.0029s00005 Dusal.0029s00005.1  | <i>Dsa</i> DKIN2.2   |
| Cre13.g568050.t1.3                                | <i>Cre</i> CKIN2.14 | Dusal.0056s00014 Dusal.0056s00014.1  | <i>Dsa</i> DKIN2.3   |
| Cre16.g657350.t1.2                                | <i>Cre</i> CKIN2.9  | Dusal.0106s00018 Dusal.0106s00018.1  | <i>Dsa</i> DKIN2.5   |
| Cre17.g707800.t1.2                                | <i>Cre</i> CKIN2.10 | Dusal.0181s00032 Dusal.0181s00032.1  | <i>Dsa</i> DKIN2.6   |
| Cre12.g485600.t1.2                                | <i>Cre</i> CKIN2.13 | Dusal.0186s00019 Dusal.0186s00019.1  | <i>Dsa</i> DKIN2.7   |
| Cre02.g076000.t1.2                                | <i>Cre</i> CKIN2.11 | Dusal.0617s00007 Dusal.0617s00007.1  | <i>Dsa</i> DKIN2.8   |
| Cre08.g384250.t1.2                                | <i>Cre</i> CKIN2.15 | Dusal.0826s00006 Dusal.0826s00006.1  | <i>Dsa</i> DKIN2.9   |
| Cre17.g707650.t1.1                                | <i>Cre</i> CKIN2.12 | fgenes1_pm.C_Ch_6000070 12650        | <i>Olu</i> OKIN1     |
| Cre07.g329850.t1.1                                | <i>Cre</i> CKIN2.16 | eugene.0100010317 28923              | <i>Olu</i> OKIN2.2   |
| Cre02.g074370.t1.2                                | <i>Cre</i> CDPK1    | ost_03_006_039 86646                 | <i>Olu</i> OKIN2.3   |
| Cre02.g106650.t1.3                                | <i>Cre</i> CDPK2    | Vocar.0025s0127.1                    | <i>Vca</i> VKIN1     |
| Cre06.g265550.t1.2                                | <i>Cre</i> CDPK3    | Vocar.0048s0006 Vocar.0048s0006.1    | <i>Vca</i> VKIN2.2   |
| Cre06.g296200.t1.2                                | <i>Cre</i> CDPK4    | Vocar.0027s0049 Vocar.0027s0049.1    | <i>Vca</i> VKIN2.3   |
| Cre07.g328900.t1.2                                | <i>Cre</i> CDPK5    | Vocar.0031s0053 Vocar.0031s0053.1    | <i>Vca</i> VKIN2.5   |
| Cre01.g048650.t1.1                                | <i>Cre</i> CDPK6    | Vocar.0004s0065 Vocar.0004s0065.1    | <i>Vca</i> VKIN2.6   |
| Cre13.g564500.t1.3                                | <i>Cre</i> CDPK8    | Vocar.0021s0079 Vocar.0021s0079.1    | <i>Vca</i> VKIN2.7   |
| Cre13.g571700.t1.1                                | <i>Cre</i> CDPK9    | Vocar.0029s0126 Vocar.0029s0126.1    | <i>Vca</i> VKIN2.8   |
| Cre19.g750597.t1.1                                | <i>Cre</i> CDPK11   | Vocar.0013s0156 Vocar.0013s0156.1    | <i>Vca</i> VKIN2.9   |
| Cre01.g003524.t1.1                                | <i>Cre</i> CDPK12   | Vocar.0024s0254 Vocar.0024s0254.1    | <i>Vca</i> VKIN2.10  |
| jgi ChINC64A_1 57611 estExt_fgenes3_pg.C_80094    | <i>Cva</i> CvKIN2.1 | Vocar.0006s0284 Vocar.0006s0284.1    | <i>Vca</i> VKIN2.11  |
| jgi ChINC64A_1 33664 estExt_Genewise1Plus.C_10631 | <i>Cva</i> CvKIN2.3 | Vocar.0001s0337.1                    | <i>Vca</i> VKIN2.12  |
| jgi ChINC64A_1 34706 estExt_Genewise1Plus.C_50310 | <i>Cva</i> CvKIN2.4 | Vocar.0001s1516 Vocar.0001s1516.1    | <i>Vca</i> VKIN2.13  |
| jgi ChINC64A_1 57249 estExt_fgenes3_pg.C_50159    | <i>Cva</i> CvKIN2.5 | Vocar.0001s1602 Vocar.0001s1602.1    | <i>Vca</i> VKIN2.14  |
| jgi ChINC64A_1 135543 IGS.gm_14_00076             | <i>Cva</i> CvKIN2.6 | Vocar.0001s1603 Vocar.0001s1603.1    | <i>Vca</i> VKIN2.15  |
| jgi ChINC64A_1 138144 IGS.gm_2_00611              | <i>Cva</i> CvKIN2.8 | Vocar.0001s1604 Vocar.0001s1604.1    | <i>Vca</i> VKIN2.16  |
| jgi ChINC64A_1 138887 IGS.gm_22_00128             | <i>Cva</i> CvKIN2.9 |                                      |                      |

**Supplementary Table S5:** Fold-change variations in the abundance of the different members of the CKIN family on data taken from Algaepath (a), and under the different stress situations that were tested by qPCR (control vs 48 h of stress).

| a) Algaepath    |       |      |                    |                                      |      |
|-----------------|-------|------|--------------------|--------------------------------------|------|
| Name            | S-    | N-   | CO <sub>2</sub> -- | H <sub>2</sub> O <sub>2</sub> , 1.0h | Fe-- |
| <i>CKIN1</i>    | 1.77  | 0.89 | 2.69               | 0.57                                 | 1.32 |
| <i>CKIN1L</i>   | 2.18  | 0.79 | 2.10               | 0.64                                 | 9.49 |
| <i>CKIN β</i>   | 1.30  | 0.54 | 1.78               | 0.59                                 | 0.72 |
| <i>CKIN βγ</i>  | 2.33  | 1.40 | 2.03               | 0.51                                 | 1.17 |
| <i>CKIN γ</i>   | 0.93  | 0.40 | 0.60               | 0.96                                 | 0.58 |
| <i>CKIN2.1</i>  | 1.23  | 0.96 | 1.39               | 0.91                                 | 1.05 |
| <i>CKIN2.2</i>  | 4.11  | 2.41 | 1.24               | 1.58                                 | 1.31 |
| <i>CKIN2.3</i>  | 2.60  | 1.39 | 1.94               | 0.76                                 | 1.15 |
| <i>CKIN2.4</i>  | 1.44  | 0.60 | 1.04               | 0.82                                 | 0.81 |
| <i>CKIN2.5</i>  | 3.52  | 1.38 | 1.23               | 1.06                                 | 1.49 |
| <i>CKIN2.6</i>  | 2.56  | 1.47 | 1.29               | 1.26                                 | 2.08 |
| <i>CKIN2.7</i>  | 1.59  | 0.87 | 1.69               | 2.55                                 | 1.20 |
| <i>CKIN2.8</i>  | 1.60  | 1.11 | 1.39               | 1.51                                 | 1.68 |
| <i>CKIN2.9</i>  | 2.13  | 1.28 | 1.01               | 0.98                                 | 0.77 |
| <i>CKIN2.10</i> | 1.77  | 1.24 | 1.62               | 1.02                                 | 1.01 |
| <i>CKIN2.11</i> | 2.00  | 1.18 | 1.84               | 0.63                                 | 1.66 |
| <i>CKIN2.12</i> | 2.32  | 0.77 | 1.26               | 1.25                                 | 1.75 |
| <i>CKIN2.13</i> | 1.60  | 1.58 | 3.45               | 0.77                                 | 7.82 |
| <i>CKIN2.14</i> | 0.75  | 0.33 | 1.42               | 1.27                                 | 2.28 |
| <i>CKIN2.15</i> | 4.48  | 2.40 | 1.01               | 2.87                                 | 8.00 |
| <i>CKIN2.16</i> | 3.03  | 1.40 | 1.86               | 1.52                                 | 1.82 |
| <i>CKINL</i>    | 16.04 | 5.61 | 1.82               | 0.48                                 | 0.69 |

| b) qPCR assays  |       |       |      |       |          |            |       |       |       |
|-----------------|-------|-------|------|-------|----------|------------|-------|-------|-------|
| Name            | S-    | N-    | C-   | 5 % P | 20 % PEG | 0.25M NaCl | 40 °C | 4 °C  | UV    |
| <i>CKIN1</i>    | 2.08  | 0.75  | 1.72 | 11.98 | 3.38     | 18.61      | 3.28  | 4.54  | 2.08  |
| <i>CKIN1L</i>   | 2.94  | 0.41  | 1.35 | 1.04  | 0.64     | 1.87       | 2.59  | 1.03  | 1.52  |
| <i>CKIN β</i>   | 1.42  | 0.33  | 1.37 | 8.03  | 8.33     | 8.70       | 2.15  | 3.21  | 7.53  |
| <i>CKIN βγ</i>  | 5.23  | 1.72  | 1.12 | 4.05  | 3.35     | 10.18      | 3.57  | 8.97  | 6.32  |
| <i>CKIN γ</i>   | 1.37  | 0.51  | 2.11 | 9.31  | 1.28     | 16.03      | 3.75  | 6.77  | 5.40  |
| <i>CKIN2.1</i>  | 1.00  | 0.76  | 0.67 | 1.33  | 440.00   | 6.72       | 2.75  | 13.54 | 21.95 |
| <i>CKIN2.2</i>  | 11.62 | 2.72  | 1.09 | 1.98  | 5.15     | 6.59       | 2.83  | 13.64 | 9.07  |
| <i>CKIN2.3</i>  | 4.73  | 1.34  | 1.51 | 3.03  | 8.74     | 12.74      | 2.77  | 9.95  | 5.79  |
| <i>CKIN2.4</i>  | 1.64  | 0.42  | 1.22 | 0.94  | 29.80    | 2.21       | 9.16  | 2.91  | 1.91  |
| <i>CKIN2.5</i>  | 10.38 | 1.50  | 1.17 | 5.16  | 105.61   | 14.33      | 6.72  | 8.30  | 21.22 |
| <i>CKIN2.6</i>  | 4.44  | 1.12  | 0.95 | 0.80  | 8.97     | 1.60       | 1.22  | 1.86  | 13.63 |
| <i>CKIN2.7</i>  | 2.15  | 0.65  | 1.05 | 2.09  | 8.05     | 9.10       | 2.69  | 6.26  | 25.96 |
| <i>CKIN2.8</i>  | 1.74  | 0.62  | 0.69 | 0.19  | 21.20    | 4.09       | 2.83  | 2.47  | 10.69 |
| <i>CKIN2.9</i>  | 4.99  | 1.13  | 0.46 | 1.27  | 16.89    | 2.78       | 1.74  | 2.12  | 9.12  |
| <i>CKIN2.10</i> | 1.98  | 1.16  | 2.61 | 2.60  | 71.84    | 7.35       | 4.82  | 2.20  | 22.04 |
| <i>CKIN2.11</i> | 2.45  | 1.17  | 0.49 | 0.72  | 134.08   | 7.97       | 1.78  | 5.87  | 19.37 |
| <i>CKIN2.12</i> | 4.47  | 1.16  | 0.58 | 1.38  | 354.10   | 5.94       | 1.25  | 6.46  | 7.76  |
| <i>CKIN2.13</i> | 1.87  | 0.44  | 0.67 | 0.37  | 6.71     | 9.19       | 1.47  | 9.78  | 3.37  |
| <i>CKIN2.14</i> | 0.28  | 0.10  | 0.25 | 0.16  | 1.64     | 0.48       | 2.16  | 0.38  | 0.52  |
| <i>CKIN2.15</i> | 13.77 | 2.21  | 0.91 | 1.39  | 230.70   | 5.73       | 2.65  | 6.67  | 10.71 |
| <i>CKIN2.16</i> | 6.87  | 1.88  | 1.02 | 1.20  | 3.52     | 4.24       | 2.22  | 1.78  | 6.99  |
| <i>CKINL</i>    | 82.94 | 16.79 | 0.27 | 0.94  | 31.78    | 10.65      | 7.31  | 10.78 | 5.90  |

**Supplementary Table S6.** Sequences of *Arabidopsis thaliana* (*Ath*), *Saccharomyces cerevisiae* (*Sce*), *Homo sapiens* (*Hsa*), and *Chlamydomonas reinhardtii* (*Cre*) employed for building sequence trees. Organism identification followed by sequence name (Name) and sequence identifier (Seq ID).

| Name                          | Seq ID             | Name                | Seq ID             |
|-------------------------------|--------------------|---------------------|--------------------|
| <i>Ath</i> AKIN10             | AT3g01090          | <i>Cre</i> CKIN2.6  | Cre11.g481000.t1.2 |
| <i>Ath</i> AKIN11             | AT3g29160          | <i>Cre</i> CKIN2.7  | Cre06.g292700.t1.2 |
| <i>Ath</i> SnRK1.3            | AT5g39440          | <i>Cre</i> CKIN2.8  | Cre10.g466350.t1.1 |
| <i>Hsa</i> AMPK $\alpha$ 1    | NP_006242.5        | <i>Cre</i> CKIN2.9  | Cre16.g657350.t1.2 |
| <i>Cre</i> CKIN1              | Cre04.g211600.t1.1 | <i>Cre</i> CKIN2.10 | Cre17.g707800.t1.2 |
| <i>Ath</i> $\beta$ 1          | AT5g21170          | <i>Cre</i> CKIN2.11 | Cre02.g076000.t1.2 |
| <i>Hsa</i> AMPK $\beta$ 2     | NP_005390.1        | <i>Cre</i> CKIN2.12 | Cre17.g707650.t1.1 |
| <i>Cre</i> CKIN1L             | Cre13.g570250.t1.1 | <i>Cre</i> CKIN2.13 | Cre12.g485600.t1.2 |
| <i>Sce</i> SNF1               | NP_010765.3        | <i>Cre</i> CKIN2.14 | Cre13.g568050.t1.3 |
| <i>Ath</i> $\beta$ 2          | AT4g16360          | <i>Cre</i> CKIN2.15 | Cre08.g384250.t1.2 |
| <i>Cre</i> CKIN $\beta$       | Cre10.g457500.t1.1 | <i>Cre</i> CKIN2.16 | Cre07.g329850.t1.1 |
| <i>Ath</i> $\beta\gamma$      | AT1g09020          | <i>Cre</i> CKINL    | Cre16.g685389.t1.1 |
| <i>Hsa</i> AMPK $\gamma$ 1    | NP_002724.1        | <i>Ath</i> SnRK3.1  | AT5g01810          |
| <i>Cre</i> CKIN $\beta\gamma$ | Cre12.g484350.t1.3 | <i>Ath</i> SnRK3.2  | AT5G07070          |
| <i>Ath</i> $\gamma$ 1         | AT3g48530          | <i>Ath</i> SnRK3.3  | AT4g14580          |
| <i>Ath</i> $\gamma$ 2         | AT1g69800          | <i>Ath</i> SnRK3.4  | AT5g57630          |
| <i>Cre</i> CKIN $\gamma$      | Cre12.g528000.t1.2 | <i>Ath</i> SnRK3.5  | AT5g45810          |
| <i>Ath</i> SnRK2.2            | AT3g50500          | <i>Cre</i> CDPK1    | Cre02.g074370.t1.2 |
| <i>Ath</i> SnRK2.6            | AT4g33950          | <i>Cre</i> CDPK2    | Cre02.g106650.t1.3 |
| <i>Ath</i> SnRK2.7            | AT4g40010          | <i>Cre</i> CDPK3    | Cre06.g265550.t1.2 |
| <i>Ath</i> SnRK2.9            | AT2g23030          | <i>Cre</i> CDPK4    | Cre06.g296200.t1.2 |
| <i>Ath</i> SnRK2.10           | AT1g60940          | <i>Cre</i> CDPK5    | Cre07.g328900.t1.2 |
| <i>Cre</i> CKIN2.1.           | Cre02.g075850.t1.1 | <i>Cre</i> CDPK6    | Cre01.g048650.t1.1 |
| <i>Cre</i> CKIN2.2            | Cre12.g499500.t1.1 | <i>Cre</i> CDPK8    | Cre13.g564500.t1.3 |
| <i>Cre</i> CKIN2.3            | Cre02.g075900.t1.1 | <i>Cre</i> CDPK9    | Cre13.g571700.t1.1 |
| <i>Cre</i> CKIN2.4            | Cre11.g477000.t1.2 | <i>Cre</i> CDPK11   | Cre19.g750597.t1.1 |
| <i>Cre</i> CKIN2.5            | Cre03.g209505.t1.1 | <i>Cre</i> CDPK12   | Cre01.g003524.t1.1 |

**Supplementary Table S7.** Primer pairs used for RT-qPCR analyses. All primers were designed with T<sub>m</sub> greater than 60°C and PCR were all conducted at an annealing temperature of 61°C.

| <b>Name</b>     | <b>ID</b>          | <b>Forward primer sequence</b> | <b>Reverse primer sequence</b> |
|-----------------|--------------------|--------------------------------|--------------------------------|
| <i>ACT</i>      | Cre13.g603700.t1.2 | GCGGCTACTCGTTCACCACCAC         | TCTCCTGCTCGAAGTCCAGGGC         |
| <i>UBI</i>      | Cre03.g159200.t1.1 | CTACCGCCGTTCTGTTCTCTGC         | CTGGCGGCAGTAGCACCACATC         |
| <i>TUB</i>      | Cre04.g216850.t1.2 | GTCCAAGCTGGGCTTCACCGTC         | GGCGGCAGATGTCTAGATGGC          |
| <i>RCK1</i>     | Cre06.g278222.t1.1 | CGACAAGAGCGTGCTGGTCTGG         | GTCAGGCAGAACTGGCCATCGG         |
| <i>CKIN1</i>    | Cre04.g211600.t1.1 | TCATGCACCCGCACATCATCCG         | CAGCCGCCCTTCTCCACAATG          |
| <i>CKIN1L</i>   | Cre13.g570250.t1.1 | CGTGGCCAGCCTCGAGTACTGC         | GGGCACGTAGAAGGCGGACAGG         |
| <i>CKIN β</i>   | Cre10.g457500.t1.1 | GATGAGCTGACAGCCGCAACC          | CACCGTGGCTCCACACGATGAC         |
| <i>CKIN βγ</i>  | Cre12.g484350.t1.3 | ACGGCTCTCTGGGTTGTTTGC          | TTGACGTTGCCAAGCGGGTCTG         |
| <i>CKIN γ</i>   | Cre12.g528000.t1.2 | CGTGCTGATGCAGGAGCTGGAG         | TCACGGTGTGCACCTTCTTGGC         |
| <i>CKIN2.1</i>  | Cre02.g075850.t1.1 | GGTCAAGCGTGAAGTGCGAACC         | GCAGTCCGCGTACTCCATCACC         |
| <i>CKIN2.2</i>  | Cre12.g499500.t1.1 | CATCTGGAGCTGCGGCGTGATG         | GCGGCGGGATGTGGTAGTCAAC         |
| <i>CKIN2.3</i>  | Cre02.g075900.t1.1 | CGTGTTCGGCCTCGACTACTGC         | GCAGGTTGAAGGGGTGCTCCAG         |
| <i>CKIN2.4</i>  | Cre11.g477000.t1.2 | GCGCGAAATTCAGTCCCATCGC         | CCCTGGTCAGCGAACTCCATGC         |
| <i>CKIN2.5</i>  | Cre03.g209505.t1.1 | CGGTGGACTACTGCCACAAGCG         | GGACCTGAAGTCGGCCTTGCTG         |
| <i>CKIN2.6</i>  | Cre11.g481000.t1.2 | GGCGGGAGCTTGTTCCTACTACG        | TCCAGCTTGATGTCGCGGTTGG         |
| <i>CKIN2.7</i>  | Cre06.g292700.t1.2 | GCTGCCGCTGCTCAAAATCTGC         | GTAAGTGGTCCGTGGCGGAATC         |
| <i>CKIN2.8</i>  | Cre10.g466350.t1.1 | GTGTGCCACCGGGATCTGAAGC         | TCTTGGGCTGGCTGTCAAACGC         |
| <i>CKIN2.9</i>  | Cre16.g657350.t1.2 | GGACGAGGCGCGGTACTTCTTC         | GTCGCACAGCTTCCAGCCAGGAG        |
| <i>CKIN2.10</i> | Cre17.g707800.t1.2 | GGCCTGCAGCGAGGAGTTCAA          | GCGGTTGAAGGTGGGGTAGTGC         |
| <i>CKIN2.11</i> | Cre02.g076000.t1.2 | ACCTGAAGCGCGAGGTGGTGTG         | GCTCCGCCAGCCACTGCTTGAG         |
| <i>CKIN2.12</i> | Cre17.g707650.t1.1 | GGTGTGAGGCTGCTGGGCACAG         | GCTTGACGCTGCAGCTCCATGC         |
| <i>CKIN2.13</i> | Cre12.g485600.t1.2 | AGGACGAGCACAAGCGCATCA          | ACGGGTGGCCAGGTCCTGTATG         |
| <i>CKIN2.14</i> | Cre13.g568050.t1.3 | CTGGAGCCGCGGGTCTACAAG          | TCCATCACCACCGCCAGGTAGG         |
| <i>CKIN2.15</i> | Cre08.g384250.t1.2 | CATCTGGTCTGCGGCGTGGTG          | TCCTCGCGCGGCACCATGATG          |
| <i>CKIN2.16</i> | Cre07.g329850.t1.1 | CATGTCGGCCGCTCCCTTGAC          | CGCGTGGCGCAGATGGTGTAGG         |
| <i>CKINL</i>    | Cre16.g685389.t1.1 | GACGTCGCCCATGGGTCAGCAC         | GGAGGTGCTACTGCCGGCATCC         |
| <i>CHX</i>      | Cre04.g215050.t1.2 | ATGATGCTGGCTTCGCGTCTCTG        | CACAATGGGGTCCGCGACCTTC         |
